# Supplementary material for: Thoracic and Upper Limb Muscle Strength Enhances 6-Minute Walk Test Performance in COPD Patients
Source: Research Square preprint supplement (doi:10.21203/rs.3.rs-6772096/v1), 2025-06-03
Supplement: Supplementary file 1 [file 09fee8ef363b8c224e009173.docx]

**Muslim Khan**

Primary Author**/** Assistant Professor, Iqra National University, Swat, Pakistan

[drmuslim17@gmail.com/](mailto:drmuslim17@gmail.com/)

**Dr. Huthaifa Atallah**
• Designation: Lecturer (Assistant Professor Rank)
• Working address: Prosthetics and Orthotics Department, Faculty of Rehabilitation Sciences, The University of Jordan, Amman 11942, Jordan.
• Email: [**h.atallah@ju.edu.jo**](mailto:h.atallah@ju.edu.jo)

**Mshari Alghadier,**

Corresponding Author/ Department of Health and Rehabilitation sciences, College of Applied Medical Sciences, Prince Sattam bin Abdulaziz University, Al-Kharj 11947, Saudi Arabia

[m.alghadier@psau.edu.sa](mailto:m.alghadier@psau.edu.sa)

**Ahmed Ibrahim Al Kharusi**

Associate Dean, School of Rehabilitation and Allied Health Sciences, Assistant Professor, University of Nizwa, Oman

[alkharusi@unizwa.edu.om](mailto:alkharusi@unizwa.edu.om)

**Ibrahim Abuzaid**

Department of Physical Therapy For Cardiovascular /Respiratory and Geriatrics, Faculty of physical therapy. South Valley University, Qena, Egypt, College of Allied Health Sciences, Jerash University, Jerash, Jordan [Ibrahim_ismail_2011@svu.edu.eg](mailto:Ibrahim_ismail_2011@svu.edu.eg), orcid 0000-0002-9401-3704

**Abdulmajeed R. Almalty**

*Physical and Occupational Therapy Department- College of Applied Medical Sciences - The Hashemite University-* [*abed_m2001@yahoo.com*](mailto:abed_m2001@yahoo.com)

*Zarqa, Jordan. Physical Therapy Department - College of Applied Medical Sciences - Jerash University - Jerash, Jordan*

**Hassan Abdelnour**

Physiotherapy Department, Faculty of Applied Medical Science, Jerash University, Jerash, Jordan, [hasphysio@gmail.com](mailto:hasphysio@gmail.com)
