# Supplementary material for: Thoracic and Upper Limb Muscle Strength Enhances 6-Minute Walk Test Performance in COPD Patients
Source: Research Square preprint supplement (doi:10.21203/rs.3.rs-6772096/v1), 2025-06-03

**Graphical Abstract**
[Image: A single-panel illustration showing a COPD patient performing the 6MWT, with an inset bar graph comparing 6MWT distances across high vs. low PImax and lat pull-down strength. Caption: “Thoracic and upper limb strength boosts 6MWT performance in COPD patients, enhancing exercise tolerance.”]


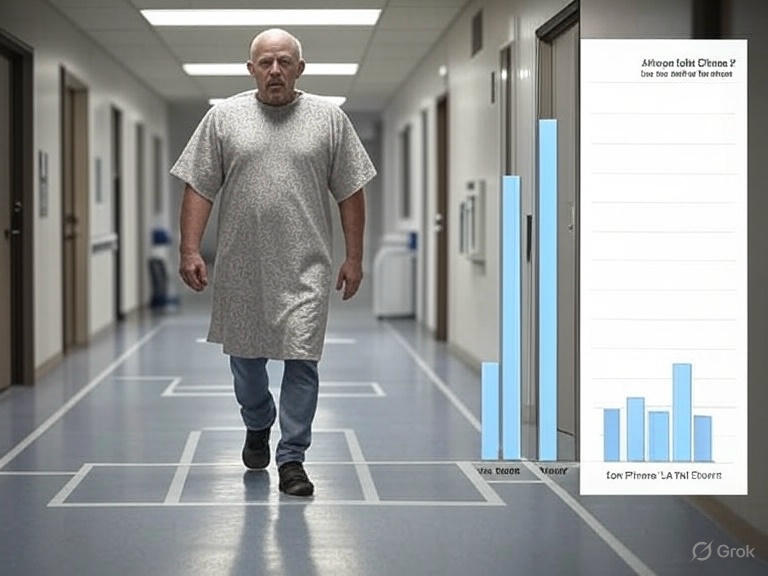

Supplement: Supplementary file 2 [file 1d00a506edefe7f8c8debb11.docx]
