# Supplementary material for: Thoracic and Upper Limb Muscle Strength Enhances 6-Minute Walk Test Performance in COPD Patients
Source: Research Square preprint supplement (doi:10.21203/rs.3.rs-6772096/v1), 2025-06-03
Supplement: Supplementary file 3 [file fe0e86f4fa9cfe6dbda4725a.docx]

All authors meet the ICMJE criteria for authorship, having made substantial contributions to the study. Their roles are detailed as follows:

- **Muslim Khan**: Conceptualized and designed the study, led data collection at King Hospital, Swat, Pakistan, performed statistical analyses using SPSS 22, drafted the initial manuscript, and revised the final manuscript for submission. As the primary author, he also coordinated the research team and ensured ethical compliance (IRB approval #KH2024-045).
- **Huthaifa Atallah**: Contributed to the study design, focusing on the measurement protocols for 6MWT and muscle strength assessments (PImax, 1RM tests), provided expertise in rehabilitation sciences, interpreted the clinical implications of the findings, and reviewed and edited the manuscript.
- **Mshari Alghadier**: Oversaw the project as the corresponding author, contributed to the study design and statistical analysis plan, ensured alignment with *Lung*’s submission requirements (e.g., STROBE guidelines), drafted the cover letter, and critically revised the manuscript for intellectual content. He also managed the submission process and data archiving on Figshare.
- **Ahmed Ibrahim Al Kharusi**: Provided methodological input on COPD patient recruitment and spirometry (FEV1) measurements, interpreted the pulmonary function data, and reviewed the manuscript for accuracy and clinical relevance.
- **Ibrahim Abuzaid**: Assisted in data collection, particularly the 6MWT and BDI assessments, contributed to the literature review for the introduction, and reviewed the manuscript, ensuring the discussion aligned with prior COPD research.
- **Abdulmajeed R. Almalty**: Supported the study design with expertise in physical therapy for respiratory conditions, assisted in interpreting the 1RM bench press and lat pull-down data, and edited the manuscript for clarity and scientific rigor.
- **Hassan Abdelnour**: Contributed in data cleaning & analysis, provided physiotherapy expertise for the 6MWT protocol, and reviewed the manuscript for clinical applicability.

All authors approved the final manuscript and agree to be accountable for all aspects of the work, ensuring its accuracy and integrity.
